# Supplementary material
Source: PubMed Central journal article supplement (PMC3275342)
Supplement: NIHMS352696-supplement-supplement_1.pdf [file NIHMS352696-supplement-supplement_1.pdf]

468 Supplementary Table 1

469

470 The data collected from the patients, who participated in the study, along with the resistance

471 patterns of the *H. pylori* isolates collected from them is presented in this table. Information is

472 given for each patient by their patient number.

Supplementary Table 1: Epidemiological and Resistance Data for Isolates from Northern Iran

| Patients Number | Disease State |                |                | Antibiotic Resistance Pattern |     |     |     |     |     |     | Demographic Information |     |                           |                      |                          |
|-----------------|---------------|----------------|----------------|-------------------------------|-----|-----|-----|-----|-----|-----|-------------------------|-----|---------------------------|----------------------|--------------------------|
|                 | Gastric ulcer | Duodenal ulcer | Gastric Cancer | Gastritis                     | TET | AMX | CIP | MTZ | CLR | FUR | Gender                  | Age | Mineral Water Consumption | Breast Fed as Infant | Low Socioeconomic Status |
| 1               |               | yes            |                |                               | 2   | 1   | 2   | 2   | 2   | 1   | female                  | 21  | no                        | yes                  | yes                      |
| 2               |               | yes            |                |                               | 1   | 1   | 1   | 1   | 2   | 2   | male                    | 19  | no                        | yes                  | yes                      |
| 3               |               | yes            |                |                               | 1   | 1   | 2   | 1   | 1   | 2   | female                  | 39  | no                        | no                   | yes                      |
| 4               |               | yes            |                |                               | 2   | 1   | 2   | 1   | 1   | 2   | male                    | 28  | yes                       | yes                  | no                       |
| 5               |               | yes            |                |                               | 1   | 2   | 1   | 2   | 1   | 2   | male                    | 26  | no                        | yes                  | yes                      |
| 6               |               | yes            |                |                               | 2   | 2   | 2   | 2   | 1   | 1   | female                  | 37  | no                        | no                   | yes                      |
| 7               |               | yes            |                |                               | 1   | 1   | 2   | 2   | 1   | 1   | male                    | 29  | no                        | no                   | yes                      |
| 8               |               | yes            |                |                               | 2   | 2   | 2   | 1   | 1   | 2   | female                  | 58  | yes                       | yes                  | yes                      |
| 9               |               | yes            |                |                               | 1   | 1   | 1   | 1   | 1   | 1   | male                    | 49  | yes                       | no                   | no                       |
| 10              |               | yes            |                |                               | 1   | 1   | 1   | 1   | 2   | 1   | female                  | 57  | yes                       | no                   | yes                      |
| 11              |               | yes            |                |                               | 1   | 1   | 2   | 2   | 1   | 2   | male                    | 46  | yes                       | no                   | yes                      |
| 12              |               | yes            |                |                               | 1   | 1   | 1   | 1   | 1   | 1   | female                  | 42  | no                        | yes                  | yes                      |
| 13              |               | yes            |                |                               | 1   | 1   | 2   | 1   | 1   | 2   | male                    | 33  | no                        | no                   | no                       |
| 14              |               | yes            |                |                               | 1   | 1   | 2   | 2   | 1   | 2   | female                  | 38  | no                        | yes                  | yes                      |
| 15              |               | yes            |                |                               | 1   | 1   | 1   | 1   | 2   | 1   | male                    | 47  | no                        | no                   | yes                      |
| 16              |               | yes            |                |                               | 1   | 1   | 1   | 1   | 2   | 1   | male                    | 66  | no                        | no                   | no                       |
| 17              |               | yes            |                |                               | 2   | 1   | 1   | 1   | 1   | 2   | female                  | 56  | no                        | no                   | yes                      |
| 18              |               | yes            |                |                               | 1   | 1   | 1   | 2   | 1   | 2   | male                    | 20  | yes                       | no                   | yes                      |
| 19              |               | yes            |                |                               | 1   | 2   | 2   | 2   | 1   | 2   | female                  | 22  | no                        | no                   | no                       |
| 20              |               | yes            |                |                               | 2   | 1   | 1   | 2   | 1   | 2   | male                    | 65  | yes                       | yes                  | no                       |
| 21              |               | yes            |                |                               | 2   | 2   | 1   | 1   | 1   | 2   | male                    | 68  | yes                       | yes                  | no                       |
| 22              |               | yes            |                |                               | 1   | 2   | 1   | 2   | 1   | 2   | male                    | 42  | no                        | no                   | no                       |
| 23              |               | yes            |                |                               | 1   | 1   | 1   | 2   | 1   | 2   | female                  | 54  | no                        | no                   | yes                      |
| 24              |               | yes            |                |                               | 1   | 1   | 2   | 2   | 2   | 2   | male                    | 49  | no                        | no                   | yes                      |

|    |     |     |   |   |   |   |   |   |        |    |     |     |     |
|----|-----|-----|---|---|---|---|---|---|--------|----|-----|-----|-----|
| 25 | yes |     | 1 | 1 | 1 | 2 | 2 | 2 | male   | 67 | no  | yes | no  |
| 26 | yes |     | 1 | 1 | 1 | 1 | 1 | 1 | female | 19 | yes | no  | no  |
| 27 | yes |     | 1 | 2 | 1 | 2 | 1 | 2 | female | 35 | yes | yes | yes |
| 28 | yes |     | 1 | 2 | 2 | 1 | 2 | 2 | male   | 34 | no  | no  | yes |
| 29 | yes |     | 1 | 1 | 1 | 2 | 1 | 1 | female | 18 | no  | no  | no  |
| 30 | yes |     | 2 | 2 | 1 | 2 | 1 | 2 | male   | 29 | no  | yes | no  |
| 31 | yes |     | 2 | 1 | 2 | 2 | 2 | 2 | male   | 38 | no  | yes | no  |
| 32 | yes |     | 2 | 1 | 1 | 2 | 1 | 2 | male   | 18 | no  | no  | no  |
| 33 | yes |     | 1 | 1 | 2 | 2 | 1 | 2 | male   | 49 | yes | no  | yes |
| 34 | yes |     | 1 | 2 | 1 | 1 | 1 | 2 | male   | 23 | yes | no  | yes |
| 35 | yes |     | 1 | 1 | 1 | 1 | 2 | 1 | male   | 45 | no  | no  | yes |
| 36 | yes |     | 1 | 2 | 1 | 2 | 2 | 2 | female | 54 | no  | no  | no  |
| 37 | yes |     | 1 | 1 | 1 | 2 | 1 | 2 | female | 35 | yes | no  | yes |
| 38 | yes |     | 2 | 1 | 1 | 2 | 2 | 2 | female | 18 | no  | no  | no  |
| 39 |     | yes | 2 | 1 | 1 | 2 | 2 | 1 | male   | 25 | no  | no  | no  |
| 40 |     | yes | 1 | 1 | 2 | 2 | 2 | 2 | female | 36 | no  | no  | yes |
| 41 |     | yes | 1 | 1 | 2 | 1 | 2 | 1 | male   | 48 | yes | yes | yes |
| 42 |     | yes | 1 | 1 | 1 | 2 | 2 | 1 | female | 19 | yes | no  | yes |
| 43 |     | yes | 1 | 1 | 2 | 2 | 2 | 2 | male   | 35 | no  | no  | yes |
| 44 |     | yes | 1 | 1 | 2 | 2 | 1 | 2 | female | 48 | no  | no  | yes |
| 45 |     | yes | 1 | 1 | 1 | 2 | 2 | 2 | female | 59 | no  | no  | yes |
| 46 |     | yes | 1 | 1 | 1 | 1 | 1 | 2 | female | 68 | no  | no  | no  |
| 47 |     | yes | 1 | 1 | 1 | 2 | 2 | 2 | male   | 49 | no  | no  | yes |
| 48 |     | yes | 1 | 1 | 1 | 2 | 1 | 2 | female | 67 | yes | no  | yes |
| 49 |     | yes | 2 | 2 | 1 | 2 | 1 | 2 | male   | 37 | no  | no  | yes |
| 50 |     | yes | 2 | 1 | 1 | 2 | 2 | 2 | male   | 29 | no  | yes | yes |
| 51 |     | yes | 1 | 2 | 1 | 1 | 2 | 1 | male   | 59 | no  | no  | yes |
| 52 |     | yes | 2 | 2 | 2 | 2 | 1 | 2 | female | 23 | no  | no  | no  |
| 53 |     | yes | 1 | 1 | 1 | 2 | 1 | 1 | male   | 18 | yes | yes | yes |
| 54 |     | yes | 1 | 1 | 1 | 1 | 1 | 2 | female | 38 | yes | no  | yes |
| 55 |     | yes | 1 | 1 | 2 | 2 | 2 | 1 | male   | 25 | no  | no  | yes |

|    |     |     |   |   |   |   |   |   |        |    |     |     |     |
|----|-----|-----|---|---|---|---|---|---|--------|----|-----|-----|-----|
| 56 |     | yes | 1 | 1 | 1 | 1 | 2 | 1 | male   | 64 | no  | no  | yes |
| 57 |     | yes | 2 | 1 | 1 | 2 | 1 | 2 | female | 36 | no  | no  | no  |
| 58 |     | yes | 1 | 1 | 1 | 2 | 1 | 1 | female | 65 | yes | no  | yes |
| 59 |     | yes | 2 | 1 | 1 | 2 | 1 | 1 | male   | 38 | no  | no  | yes |
| 60 |     | yes | 2 | 1 | 1 | 2 | 1 | 2 | female | 49 | no  | no  | no  |
| 61 |     | yes | 1 | 1 | 1 | 1 | 2 | 1 | female | 65 | yes | no  | yes |
| 62 |     | yes | 2 | 1 | 1 | 1 | 2 | 2 | female | 47 | no  | no  | no  |
| 63 |     | yes | 2 | 1 | 2 | 1 | 2 | 2 | male   | 18 | yes | no  | no  |
| 64 |     | yes | 2 | 1 | 1 | 2 | 1 | 2 | female | 24 | yes | no  | yes |
| 65 |     | yes | 1 | 1 | 1 | 2 | 2 | 1 | female | 56 | no  | no  | no  |
| 66 |     | yes | 1 | 2 | 2 | 1 | 2 | 2 | male   | 45 | yes | no  | yes |
| 67 |     | yes | 1 | 1 | 2 | 2 | 2 | 1 | female | 40 | no  | no  | yes |
| 68 |     | yes | 1 | 1 | 1 | 2 | 2 | 1 | male   | 43 | no  | no  | no  |
| 69 |     | yes | 1 | 1 | 1 | 1 | 2 | 2 | female | 41 | no  | no  | no  |
| 70 |     | yes | 2 | 1 | 1 | 2 | 2 | 2 | male   | 20 | no  | no  | yes |
| 71 |     | yes | 2 | 1 | 1 | 1 | 2 | 2 | female | 39 | no  | no  | yes |
| 72 |     | yes | 2 | 1 | 1 | 1 | 2 | 2 | male   | 30 | no  | yes | no  |
| 73 |     | yes | 2 | 1 | 2 | 2 | 2 | 2 | female | 32 | yes | no  | yes |
| 74 |     | yes | 2 | 1 | 1 | 1 | 1 | 2 | female | 38 | yes | no  | no  |
| 75 |     | yes | 1 | 1 | 2 | 1 | 2 | 2 | male   | 23 | no  | yes | no  |
| 76 |     | yes | 1 | 1 | 1 | 2 | 1 | 2 | female | 37 | yes | yes | yes |
| 77 |     | yes | 1 | 1 | 2 | 2 | 1 | 1 | male   | 19 | no  | yes | yes |
| 78 |     | yes | 1 | 1 | 1 | 1 | 1 | 2 | female | 29 | yes | no  | no  |
| 79 | yes |     | 1 | 1 | 2 | 2 | 2 | 2 | male   | 64 | no  | no  | yes |
| 80 | yes |     | 1 | 1 | 2 | 1 | 2 | 1 | male   | 71 | no  | no  | yes |
| 81 | yes |     | 1 | 2 | 1 | 1 | 1 | 1 | female | 41 | yes | no  | no  |
| 82 | yes |     | 2 | 1 | 2 | 2 | 1 | 2 | male   | 57 | no  | yes | no  |
| 83 | yes |     | 2 | 1 | 2 | 1 | 2 | 1 | male   | 67 | no  | no  | no  |
| 84 | yes |     | 1 | 2 | 2 | 1 | 1 | 2 | male   | 52 | no  | no  | yes |
| 85 | yes |     | 1 | 1 | 1 | 1 | 2 | 1 | female | 32 | yes | no  | yes |
| 86 | yes |     | 2 | 1 | 1 | 2 | 1 | 1 | female | 20 | no  | no  | no  |

|     |     |     |   |   |   |   |   |   |        |    |     |     |     |
|-----|-----|-----|---|---|---|---|---|---|--------|----|-----|-----|-----|
| 87  | yes |     | 1 | 1 | 1 | 1 | 1 | 1 | male   | 28 | no  | no  | yes |
| 88  | yes |     | 2 | 1 | 1 | 2 | 2 | 1 | male   | 49 | no  | yes | yes |
| 89  | yes |     | 2 | 2 | 1 | 2 | 1 | 2 | female | 50 | no  | yes | no  |
| 90  | yes |     | 1 | 1 | 2 | 1 | 1 | 2 | female | 51 | no  | no  | no  |
| 91  | yes |     | 2 | 1 | 2 | 2 | 2 | 2 | male   | 35 | no  | yes | yes |
| 92  | yes |     | 1 | 2 | 1 | 2 | 1 | 1 | female | 61 | no  | no  | no  |
| 93  | yes |     | 1 | 1 | 1 | 2 | 2 | 2 | female | 42 | no  | yes | yes |
| 94  | yes |     | 2 | 2 | 1 | 2 | 2 | 1 | male   | 22 | no  | no  | yes |
| 95  |     | yes | 2 | 1 | 2 | 2 | 2 | 2 | male   | 25 | yes | no  | no  |
| 96  |     | yes | 1 | 1 | 2 | 1 | 1 | 2 | male   | 33 | no  | yes | yes |
| 97  |     | yes | 1 | 1 | 2 | 1 | 2 | 2 | female | 25 | no  | no  | no  |
| 98  |     | yes | 1 | 1 | 1 | 2 | 2 | 2 | male   | 29 | no  | no  | no  |
| 99  |     | yes | 2 | 2 | 2 | 2 | 2 | 2 | male   | 30 | no  | no  | yes |
| 100 |     | yes | 1 | 2 | 2 | 2 | 2 | 2 | female | 32 | yes | yes | yes |
| 101 |     | yes | 2 | 1 | 1 | 2 | 2 | 2 | female | 38 | no  | no  | no  |
| 102 |     | yes | 1 | 2 | 2 | 2 | 1 | 1 | male   | 23 | no  | no  | yes |
| 103 |     | yes | 1 | 2 | 2 | 1 | 2 | 2 | male   | 54 | no  | no  | no  |
| 104 |     | yes | 1 | 1 | 1 | 2 | 1 | 1 | female | 19 | no  | no  | yes |
| 105 |     | yes | 2 | 1 | 1 | 2 | 1 | 2 | male   | 29 | yes | yes | no  |
| 106 |     | yes | 2 | 1 | 1 | 2 | 2 | 1 | female | 64 | yes | no  | yes |
| 107 |     | yes | 1 | 2 | 1 | 1 | 2 | 2 | female | 71 | no  | no  | yes |
| 108 |     | yes | 1 | 1 | 2 | 2 | 2 | 1 | male   | 19 | no  | no  | no  |
| 109 |     | yes | 1 | 1 | 1 | 1 | 1 | 2 | female | 56 | no  | no  | yes |
| 110 |     | yes | 1 | 2 | 2 | 1 | 2 | 1 | female | 34 | yes | no  | no  |
| 111 |     | yes | 1 | 2 | 1 | 2 | 2 | 1 | female | 23 | no  | yes | yes |
| 112 |     | yes | 2 | 2 | 1 | 1 | 2 | 2 | male   | 20 | no  | no  | yes |
| 113 |     | yes | 1 | 2 | 1 | 2 | 1 | 1 | female | 56 | no  | no  | yes |
| 114 |     | yes | 2 | 1 | 1 | 2 | 2 | 2 | female | 58 | no  | no  | no  |
| 115 |     | yes | 1 | 1 | 1 | 2 | 2 | 1 | male   | 74 | no  | no  | yes |
| 116 |     | yes | 2 | 2 | 1 | 2 | 2 | 2 | female | 22 | no  | no  | yes |
| 117 |     | yes | 1 | 1 | 1 | 2 | 2 | 1 | male   | 33 | no  | no  | yes |

|     |     |   |   |   |   |   |   |        |    |     |     |     |
|-----|-----|---|---|---|---|---|---|--------|----|-----|-----|-----|
| 118 | yes | 2 | 2 | 2 | 2 | 1 | 2 | male   | 36 | no  | yes | no  |
| 119 | yes | 2 | 2 | 1 | 2 | 2 | 2 | male   | 39 | no  | yes | yes |
| 120 | yes | 1 | 1 | 1 | 2 | 1 | 2 | male   | 54 | yes | no  | no  |
| 121 | yes | 2 | 1 | 1 | 1 | 1 | 1 | male   | 51 | no  | yes | yes |
| 122 | yes | 2 | 2 | 1 | 2 | 1 | 2 | female | 50 | no  | yes | no  |
| 123 | yes | 1 | 1 | 2 | 2 | 1 | 2 | male   | 56 | yes | no  | yes |
| 124 | yes | 2 | 1 | 1 | 1 | 1 | 1 | female | 55 | yes | no  | no  |
| 125 | yes | 1 | 1 | 1 | 2 | 1 | 2 | male   | 21 | no  | no  | no  |
| 126 | yes | 2 | 1 | 1 | 2 | 2 | 2 | female | 33 | no  | yes | yes |
| 127 | yes | 2 | 2 | 1 | 2 | 1 | 2 | male   | 65 | no  | no  | yes |
| 128 | yes | 1 | 1 | 2 | 2 | 1 | 1 | female | 19 | no  | no  | no  |
| 129 | yes | 1 | 1 | 1 | 1 | 2 | 2 | female | 43 | no  | no  | yes |
| 130 | yes | 1 | 1 | 1 | 2 | 1 | 2 | male   | 71 | yes | yes | yes |
| 131 | yes | 1 | 1 | 1 | 1 | 1 | 2 | female | 42 | no  | no  | yes |
| 132 | yes | 1 | 1 | 2 | 2 | 1 | 2 | male   | 35 | no  | no  | yes |
| 133 | yes | 1 | 1 | 1 | 2 | 1 | 2 | male   | 36 | no  | no  | no  |
| 134 | yes | 1 | 1 | 1 | 1 | 1 | 1 | female | 61 | no  | no  | yes |
| 135 | yes | 2 | 2 | 1 | 1 | 1 | 2 | male   | 40 | no  | yes | no  |
| 136 | yes | 1 | 1 | 1 | 2 | 1 | 2 | male   | 30 | no  | yes | no  |
| 137 | yes | 1 | 1 | 1 | 2 | 1 | 2 | female | 26 | no  | no  | yes |
| 138 | yes | 1 | 2 | 1 | 2 | 2 | 1 | female | 28 | no  | no  | yes |
| 139 | yes | 1 | 1 | 1 | 2 | 1 | 2 | male   | 39 | no  | no  | no  |
| 140 | yes | 1 | 1 | 1 | 2 | 2 | 1 | male   | 45 | yes | no  | yes |
| 141 | yes | 1 | 1 | 2 | 1 | 1 | 1 | female | 41 | no  | no  | yes |
| 142 | yes | 1 | 1 | 1 | 2 | 1 | 1 | female | 67 | no  | yes | yes |
| 143 | yes | 1 | 1 | 1 | 2 | 1 | 2 | male   | 49 | no  | yes | no  |
| 144 | yes | 1 | 1 | 2 | 2 | 1 | 1 | female | 40 | no  | no  | yes |
| 145 | yes | 2 | 1 | 1 | 2 | 1 | 2 | male   | 32 | no  | yes | yes |
| 146 | yes | 2 | 1 | 1 | 1 | 1 | 2 | female | 33 | no  | no  | yes |
| 147 | yes | 2 | 1 | 1 | 1 | 1 | 2 | male   | 36 | no  | yes | no  |
| 148 | yes | 1 | 1 | 2 | 2 | 2 | 2 | female | 21 | no  | yes | no  |

|     |     |     |   |   |   |   |   |   |        |    |     |     |     |
|-----|-----|-----|---|---|---|---|---|---|--------|----|-----|-----|-----|
| 149 |     | yes | 1 | 1 | 1 | 2 | 1 | 2 | female | 48 | yes | yes | yes |
| 150 |     | yes | 1 | 1 | 1 | 1 | 1 | 2 | female | 40 | no  | no  | yes |
| 151 |     | yes | 1 | 1 | 1 | 2 | 2 | 2 | male   | 41 | no  | yes | no  |
| 152 |     | yes | 2 | 2 | 1 | 2 | 1 | 2 | female | 40 | no  | yes | yes |
| 153 |     | yes | 1 | 1 | 1 | 2 | 2 | 2 | female | 19 | no  | no  | yes |
| 154 |     | yes | 2 | 2 | 1 | 2 | 1 | 1 | male   | 23 | yes | yes | yes |
| 155 |     | yes | 1 | 1 | 1 | 2 | 1 | 1 | male   | 35 | yes | no  | no  |
| 156 |     | yes | 2 | 2 | 2 | 2 | 2 | 1 | male   | 36 | no  | no  | yes |
| 157 |     | yes | 2 | 1 | 1 | 1 | 2 | 1 | male   | 22 | no  | no  | yes |
| 158 |     | yes | 1 | 1 | 2 | 2 | 1 | 1 | male   | 40 | no  | yes | yes |
| 159 |     | yes | 1 | 2 | 1 | 2 | 1 | 2 | female | 60 | yes | no  | yes |
| 160 |     | yes | 1 | 1 | 1 | 2 | 1 | 1 | female | 32 | no  | yes | yes |
| 161 |     | yes | 1 | 1 | 2 | 2 | 1 | 2 | male   | 28 | yes | yes | no  |
| 162 |     | yes | 1 | 1 | 2 | 1 | 1 | 2 | male   | 69 | no  | yes | yes |
| 163 |     | yes | 1 | 1 | 2 | 2 | 1 | 2 | female | 45 | no  | no  | yes |
| 164 |     | yes | 1 | 1 | 2 | 1 | 1 | 2 | female | 47 | no  | no  | no  |
| 165 |     | yes | 1 | 1 | 1 | 2 | 1 | 1 | female | 30 | yes | no  | no  |
| 166 | yes |     | 2 | 1 | 1 | 2 | 2 | 2 | male   | 26 | yes | no  | yes |
| 167 | yes |     | 1 | 1 | 1 | 2 | 2 | 1 | male   | 36 | yes | no  | yes |
| 168 | yes |     | 2 | 1 | 2 | 2 | 1 | 1 | female | 39 | no  | no  | yes |
| 169 | yes |     | 1 | 1 | 1 | 2 | 2 | 1 | female | 47 | no  | yes | yes |
| 170 | yes |     | 1 | 2 | 2 | 1 | 1 | 1 | female | 41 | no  | no  | no  |
| 171 | yes |     | 1 | 1 | 1 | 1 | 1 | 2 | female | 25 | no  | no  | no  |
| 172 | yes |     | 1 | 2 | 1 | 2 | 1 | 1 | female | 65 | no  | no  | yes |
| 173 | yes |     | 2 | 2 | 2 | 2 | 2 | 2 | female | 30 | no  | no  | yes |
| 174 | yes |     | 1 | 1 | 1 | 1 | 1 | 1 | male   | 69 | yes | no  | no  |
| 175 | yes |     | 2 | 2 | 2 | 2 | 2 | 1 | female | 21 | no  | yes | yes |
| 176 | yes |     | 1 | 1 | 1 | 1 | 1 | 2 | male   | 45 | yes | yes | yes |
| 177 | yes |     | 1 | 1 | 1 | 1 | 2 | 2 | female | 47 | no  | yes | yes |
| 178 | yes |     | 1 | 1 | 2 | 2 | 1 | 1 | female | 65 | yes | yes | yes |
| 179 | yes |     | 2 | 1 | 2 | 2 | 1 | 2 | male   | 35 | no  | yes | yes |

|     |     |   |   |   |   |   |   |        |    |     |     |     |
|-----|-----|---|---|---|---|---|---|--------|----|-----|-----|-----|
| 180 | yes | 2 | 1 | 2 | 2 | 1 | 1 | male   | 60 | no  | no  | yes |
| 181 | yes | 2 | 1 | 1 | 2 | 2 | 2 | female | 19 | yes | no  | yes |
| 182 | yes | 1 | 1 | 1 | 1 | 2 | 1 | male   | 48 | no  | no  | no  |
| 183 | yes | 1 | 1 | 2 | 2 | 2 | 2 | female | 44 | yes | no  | no  |
| 184 | yes | 2 | 1 | 1 | 2 | 1 | 2 | male   | 42 | no  | no  | yes |
| 185 | yes | 1 | 2 | 2 | 2 | 1 | 1 | female | 67 | yes | no  | no  |
| 186 | yes | 2 | 1 | 1 | 1 | 1 | 1 | male   | 39 | yes | no  | yes |
| 187 | yes | 2 | 1 | 1 | 2 | 2 | 2 | male   | 65 | yes | yes | yes |
| 188 | yes | 2 | 1 | 1 | 1 | 1 | 2 | female | 32 | no  | yes | yes |
| 189 | yes | 2 | 1 | 2 | 1 | 2 | 1 | male   | 39 | yes | no  | yes |
| 190 | yes | 2 | 2 | 2 | 1 | 2 | 2 | male   | 58 | yes | yes | no  |
| 191 | yes | 1 | 1 | 2 | 2 | 1 | 1 | male   | 55 | yes | no  | yes |
| 192 | yes | 2 | 1 | 1 | 2 | 2 | 1 | female | 47 | no  | yes | yes |
| 193 | yes | 1 | 1 | 1 | 2 | 2 | 2 | male   | 27 | no  | yes | yes |
| 194 | yes | 2 | 1 | 1 | 2 | 2 | 1 | male   | 32 | no  | no  | yes |
| 195 | yes | 1 | 1 | 1 | 2 | 2 | 2 | male   | 50 | no  | no  | no  |
| 196 | yes | 2 | 2 | 1 | 2 | 2 | 2 | male   | 40 | yes | yes | yes |
| 197 | yes | 2 | 1 | 2 | 2 | 2 | 1 | female | 28 | no  | yes | no  |

---

AMX - amoxicillin, CIP - ciprofloxacin, CLR - clarithromycin, FUR - furizoladone, MTZ - metronidazole, and TET - tetracycline

1 = sensitive, 2 = resistant
